# Supplementary material
Source: Springer Nature journal article supplement (https://www.springermedizin.de/resource/supplementary/12913_2009_1149_MOESM1_ESM.pdf/9527708)
Supplement: MOESM1 [file 9527708]

**If PHCC accepts to participate**

PHCC  
Allocation  
Assignment

**Patient consults GP for Low Back Pain.**  
The GP evaluates the patient for red flags.  
The GP explains the study and informs the patient that they will receive a call from him/her to ask about his/her pain

After 14 DAYS

**If the Low Back Pain does not persist**  
the patient is not eligible for the study

**If the Low Back Pain persists**

If the patient **does not accept** to participate in the study

**Sub-acute Low Back Pain**  
The GP re-evaluates the red flags  
The trained fellow (TF) books an appointment with the patient for the sub-acute interview  
The TF informs the patient about the trial, confirms eligibility and gains informed consent.  
The sub-acute interview is done.  
The patient (if the PHCC is allocated to the intervention Group) receives a leaflet with information about biopsychosocial multidisciplinary group intervention (BMGI).

15 days to 8 weeks

**CONTROL GROUP**  
**PHCC=19; N=466 participants**  
The patient receives a phone call for the appointment for the follow-up before the three months

**INTERVENTION GROUP**  
**PHCC=19; N=466 participants**  
The patient receives a phone call from TF to inform him/her about available dates for the BMGI. The patient receives a phone call 1 week before the BMGI and a SMS the day before the intervention

**Biopsychosocial multidisciplinary group intervention**  
10 hours

30 days to 10 weeks

**FOLLOW-UP VISITS AT 3, 6 AND 12 MONTHS**
